# Supplementary material
Source: publisher figshare collection journal article supplement (https://acs.figshare.com/ndownloader/files/8421791)
Supplement: Supplementary file 1 [file 8421791]

## Supporting Information

### **Neutron Scattering Measurements of Carbon Dioxide Adsorption in Pores within the Marcellus Shale: Implications for Sequestration**

*Konstantinos L. Stefanopoulos<sup>1‡</sup>, Tristan G.A. Youngs<sup>2‡</sup>, Richard Sakurovs<sup>3‡</sup>, Leslie F.  
Ruppert<sup>4\*‡</sup>, Jitendra Bahadur<sup>5‡</sup>, and Yuri B. Melnichenko<sup>6††‡</sup>*

<sup>1</sup>Institute of Nanoscience & Nanotechnology, NCSR “Demokritos”, Greece

<sup>2</sup>Disordered Materials Group (ISIS), STFC Rutherford Appleton Laboratory, U.K.

<sup>3</sup>CSIRO Energy, CSIRO Riverside Life Sciences Centre, Australia

<sup>4\*</sup>U.S. Geological Survey, Eastern Energy Resource Science Center, USA

<sup>5#</sup> Biology and Soft Matter Division, Oak Ridge National Laboratory, Tennessee, USA

<sup>6††</sup> Biology and Soft Matter Division, Oak Ridge National Laboratory, Tennessee, USA

(Deceased March 18, 2016)

Corresponding author: Leslie Ruppert ([lruppert@usgs.gov](mailto:lruppert@usgs.gov); phone +1703-648-6431)

4 pages

2 Figures

1 Table

Figure S1 – Schematic of the NIMROD sample environment. A null scattering  $\text{Ti}_{0.676}\text{Zr}_{0.324}$  cell (internal dimensions of 3.4 cm (width) x 5.6 cm (height) x 0.2 cm (thickness), wall thickness 0.1 cm) was used as a sample container. The sample was placed into the cell onto a shim in order to site it at the correct height, and the cell was sealed with a gasket indium seal. The top sealing flange of the cell was a 316SS plate with 1/4" tube connected with a valve and then to a 1/8" (OD) 316 SS capillary. The setup was mounted onto a candlestick with temperature control provided by a recirculating oil bath, and connected to a gas handling manifold equipped with a relief valve (80 bar), a pressure transducer (0-100 bar), and gas and vacuum connections. The gas line was connected to a high purity  $\text{CO}_2$  cylinder (99.9996%) system with the aid of a reducer.

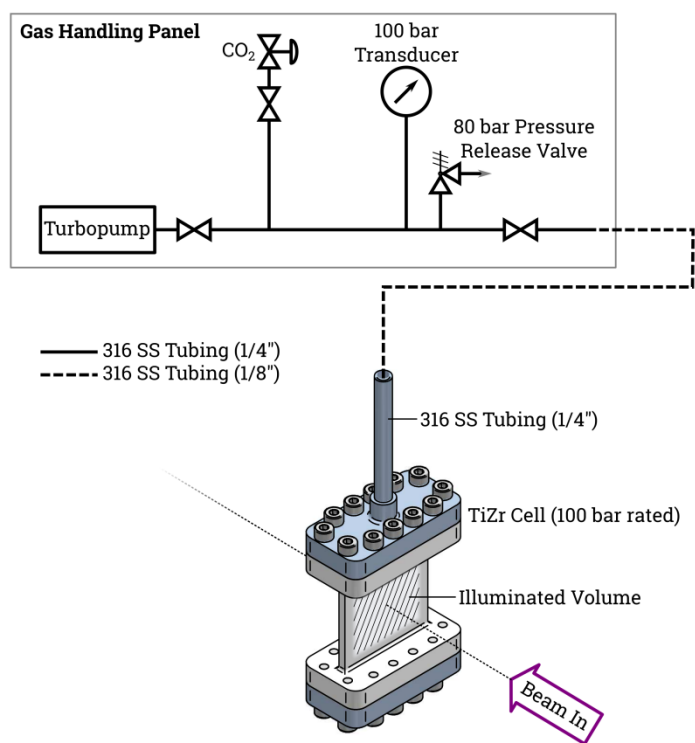

Figure S2 - Ratio of scattering intensity in CO<sub>2</sub> at 22°C and 25 and 40 bar compared to vacuum (SANS and NIMROD) for the Marcellus Shale after subtraction of flat background and showing error bars. Inset: Ratio of scattering intensity in CO<sub>2</sub> at 60°C and 25 and 40 bar (SANS) compared to vacuum showing error bars. NIMROD data of  $Q > 1 \text{ \AA}^{-1}$  were not used because the flat background was the dominant source of scattering at high  $Q$ : once it was removed, the remaining signal was very small and the errors in the ratios were very large at high  $Q$ .

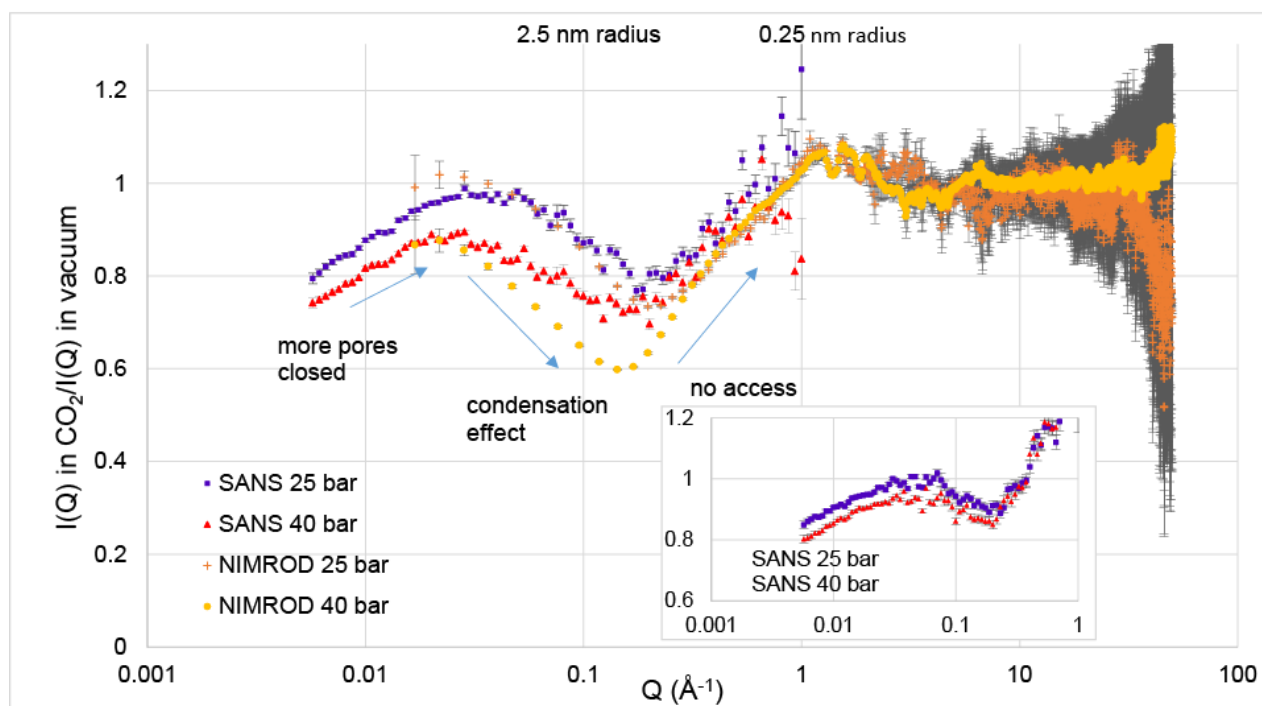

Table S1 - Expected fraction of SANS scattering intensity compared to vacuum for shale pressurized with CO<sub>2</sub> at our operating conditions. Comparison of expected scattering intensity and measured scattering intensity is used to estimate densification of CO<sub>2</sub> in pores and the percentage of open and closed micropores in the sample.

| Conditions  | CO <sub>2</sub> density<br>(g/cm <sup>3</sup> ) | Expected<br>fraction of<br>scattering<br>intensity |
|-------------|-------------------------------------------------|----------------------------------------------------|
| 22°C 25 bar | 0.052                                           | 0.94                                               |
| 22°C 40 bar | 0.095                                           | 0.88                                               |
| 60°C 25 bar | 0.043                                           | 0.95                                               |
| 60°C 40 bar | 0.074                                           | 0.91                                               |
